# Supplementary material for: Anticancer activity of pyrimidodiazepines based on 2-chloro-4-anilinoquinazoline: synthesis, DNA binding and molecular docking
Source: Royal Society of Chemistry journal article supplement (doi:10.1039/d1ra03509f), 2021-01-01
Supplement: d1ra03509f1.pdf [file d1ra03509f1.pdf]

# Anticancer activity of new pyrimidodiazepines based on 2-chloro-4-anilinoquinazoline: synthesis, DNA binding and molecular docking

Viviana Cuartas <sup>a,b</sup>, Alberto Aragón-Muriel <sup>c</sup>, Yamil Liscano <sup>d</sup>, Dorian Polo-Cerón <sup>c</sup>, Maria del Pilar

Crespo-Ortiz <sup>e</sup>, Jairo Quiroga <sup>a</sup>, Rodrigo Abonia <sup>a</sup>, Braulio Insuasty <sup>a,b\*</sup>

<sup>a</sup> Grupo de Investigación de Compuestos Heterocíclicos, Departamento de Química, Universidad del Valle, A. A. 25360 Cali, Colombia. <sup>b</sup> Centre for Bioinformatics and Photonics-CIBioFI, Calle 13 No. 100-00, Edificio E20, No. 1069, Cali, Colombia. <sup>c</sup> Laboratorio de Investigación en Catálisis y Procesos (LICAP), Departamento de Química, Universidad del Valle, 760001 Cali, Colombia. <sup>d</sup> Grupo de Investigación en Química y Biotecnología (QUIBIO), Universidad Santiago de Cali, 760031 Cali, Colombia. <sup>e</sup> Grupo de Biotecnología e Infecciones bacterianas, Departamento de Microbiología, Universidad del Valle, Cali 760043, Colombia.  
\*Correspondence: braulio.insuasty@correounivalle.edu.co; Tel.: +57-315-484-6665; Fax: +57-2339-3248.

## SUPPORTING INFORMATION

|                                                                                               |               |
|-----------------------------------------------------------------------------------------------|---------------|
| NCI 60 Cell One-Dose Screen of compounds <b>14g</b> , <b>16a</b> and <b>16c</b> .....         | Pages S2-S4   |
| NCI 60 Cell Five-Dose Screen of compounds <b>14g</b> , <b>16a</b> and <b>16c</b> .....        | Pages S5-S10  |
| <sup>1</sup> H and <sup>13</sup> C NMR spectra of representative compounds of the series..... | Pages S11-S18 |

NCI 60 Cell One-Dose Screen - Compound 14g (NSC: 822723)

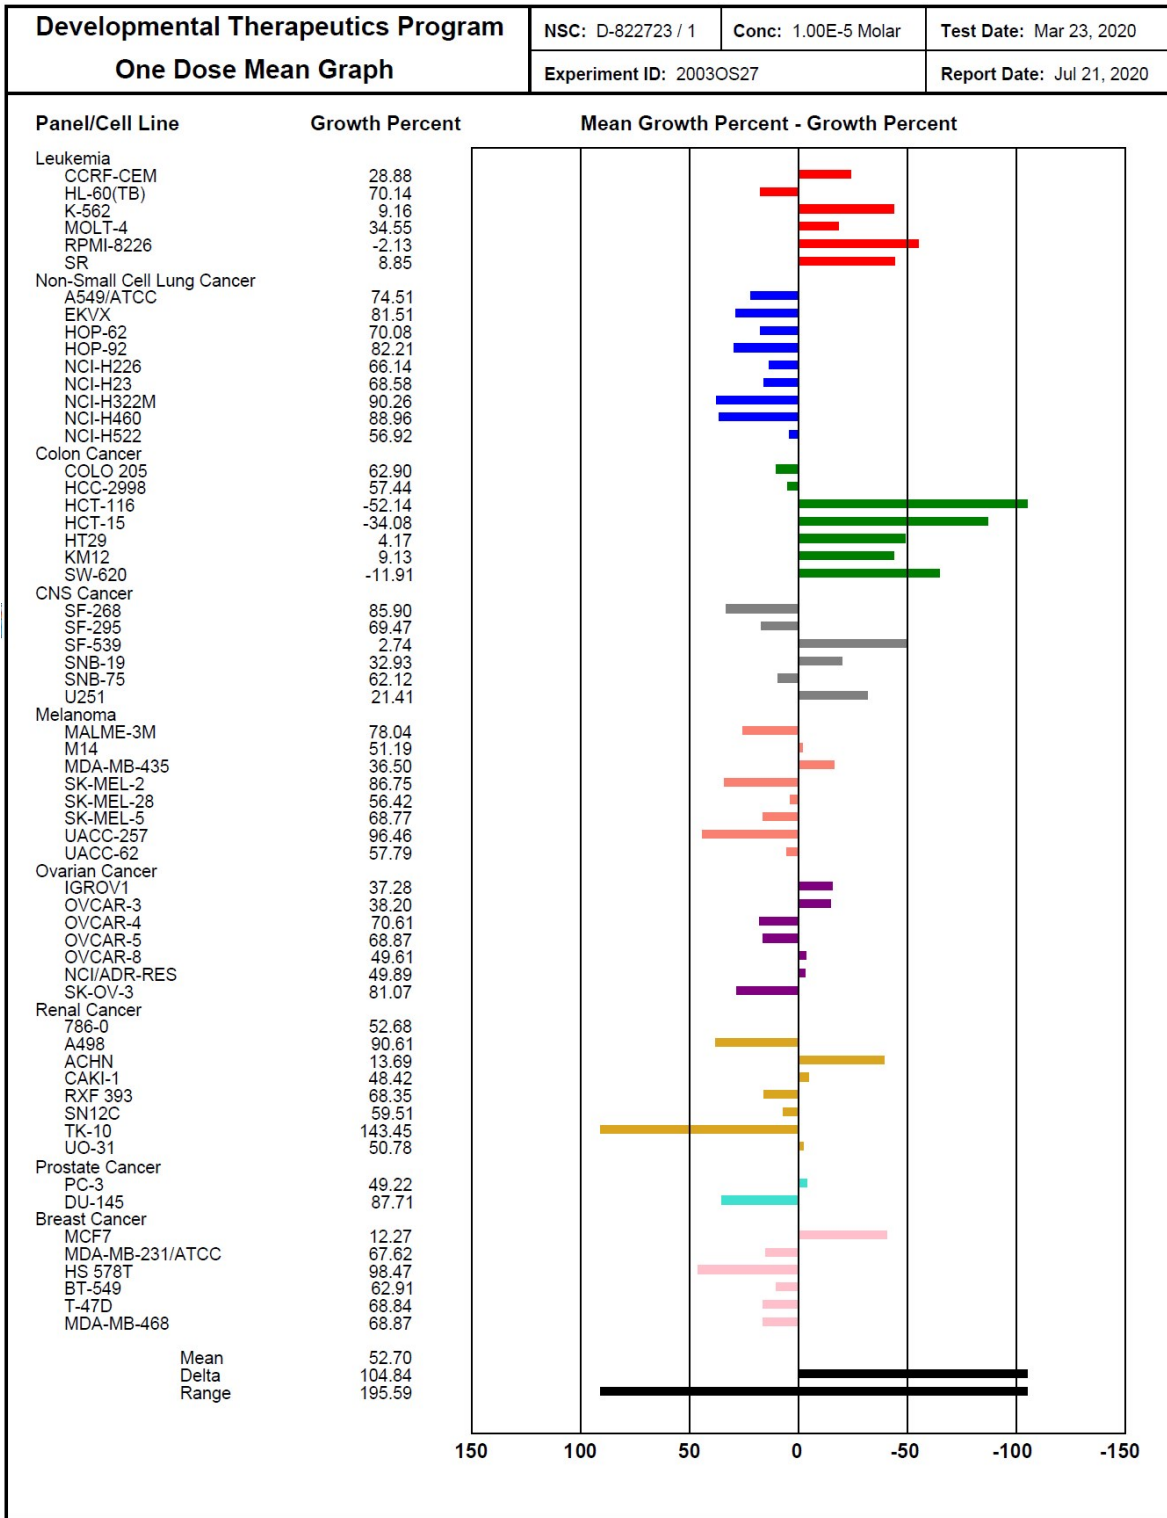

NCI 60 Cell One-Dose Screen - Compound 16a (NSC: 826382)

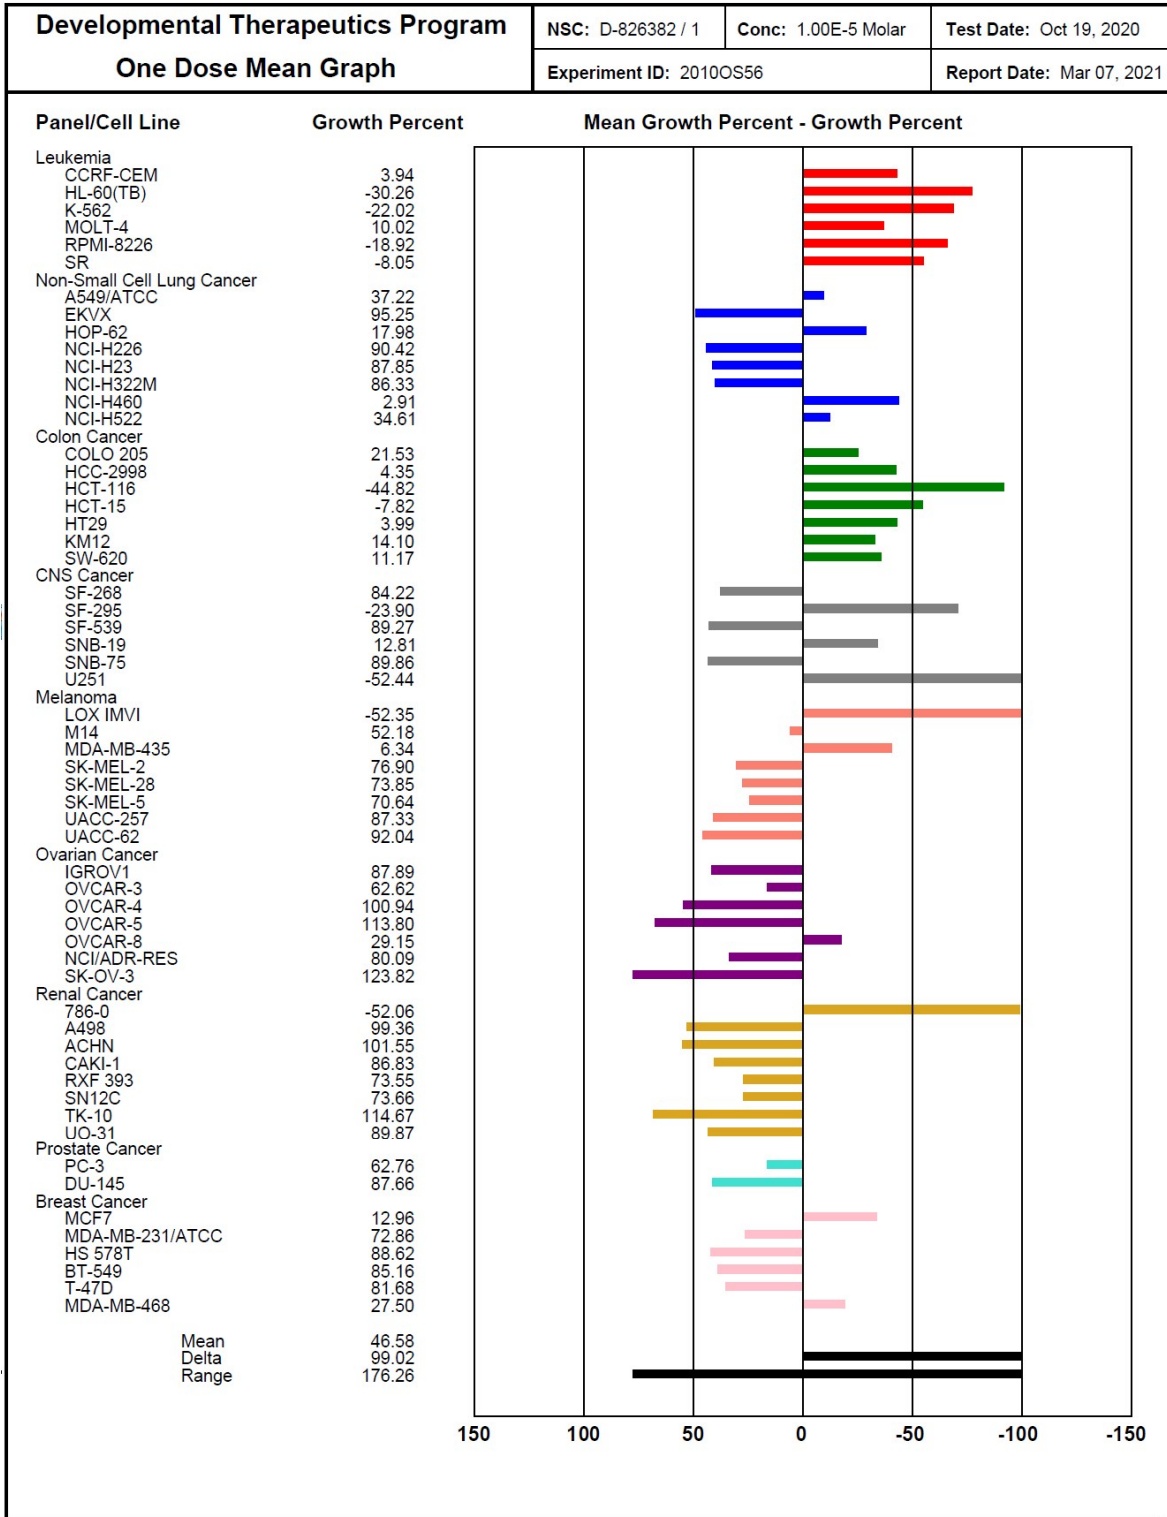

NCI 60 Cell One-Dose Screen - Compound 16c (NSC: 826384)

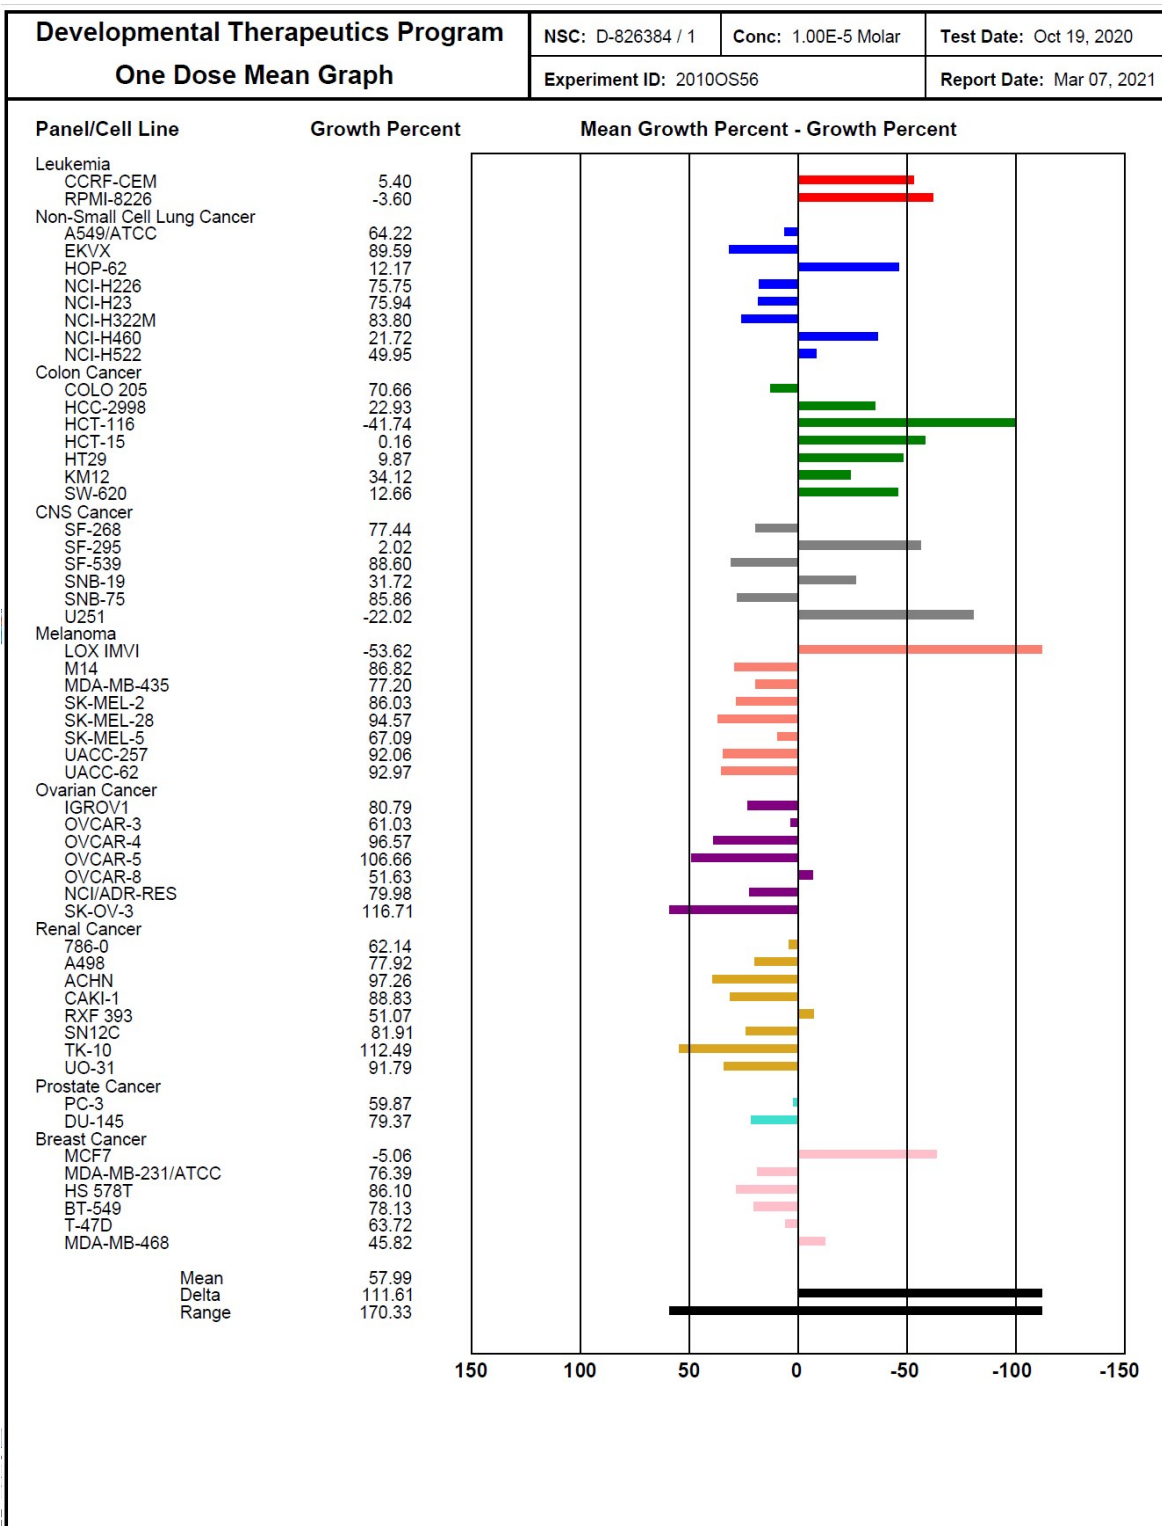



# National Cancer Institute Developmental Therapeutics Program Dose Response Curves - Compound 14g (NSC: 822723)

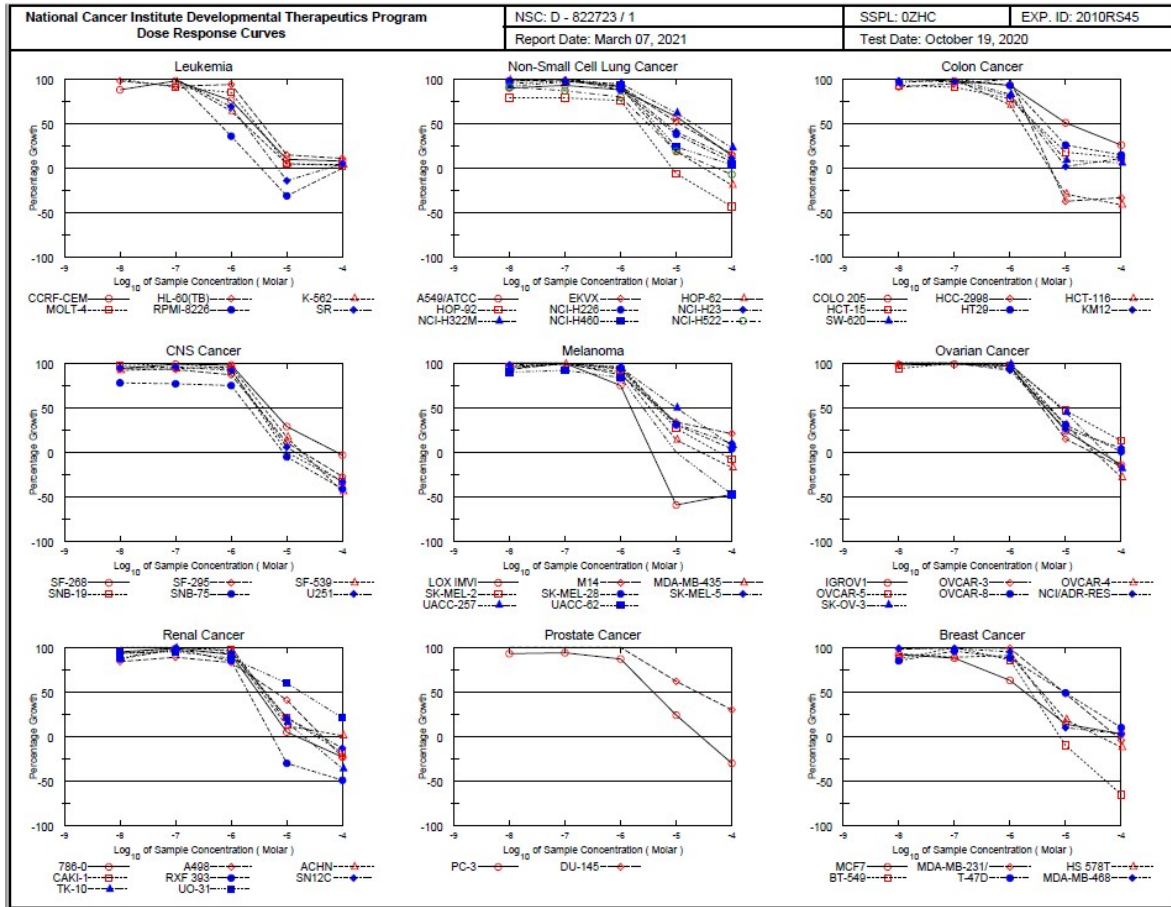



# National Cancer Institute Developmental Therapeutics Program Dose Response Curves - Compound 16a (NSC: 826382)

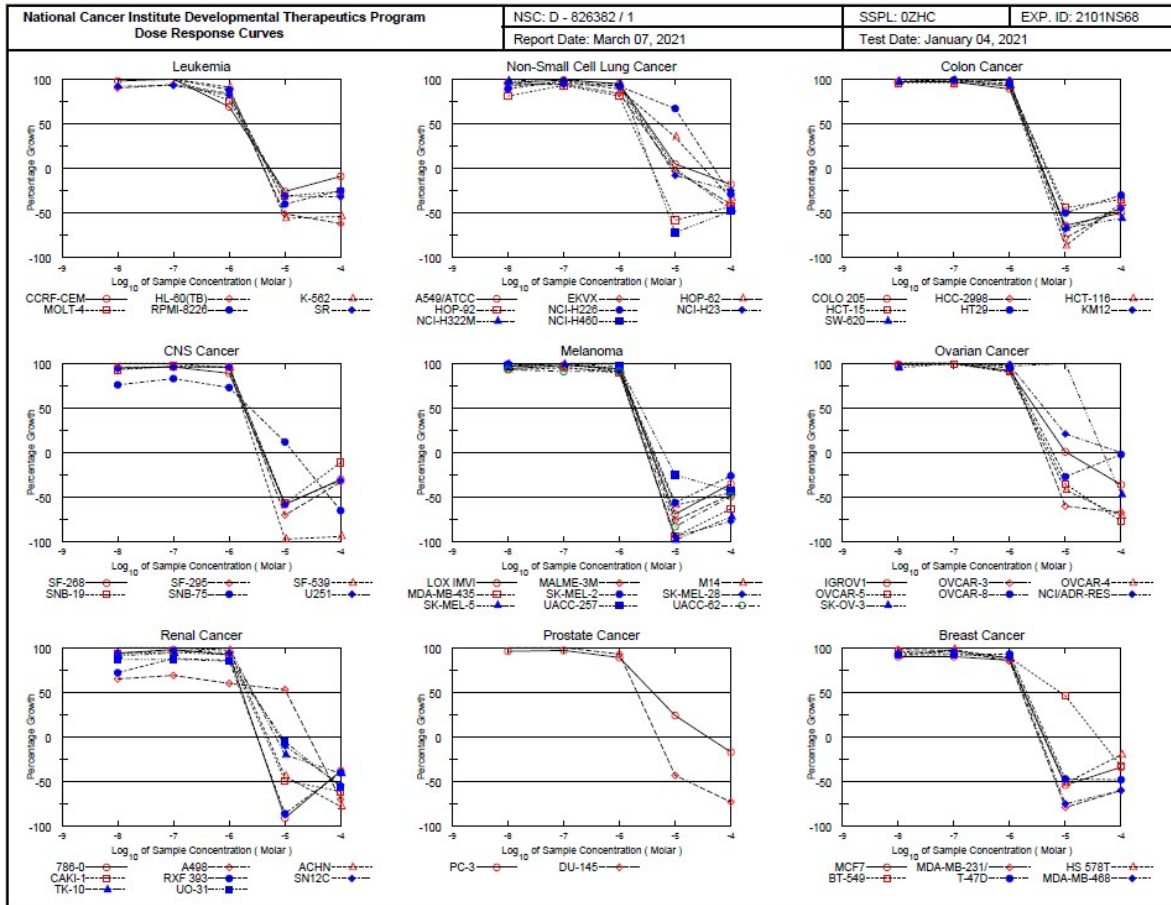



**NCI 60 Cell Five-Dose Screen - Compound 16c (NSC: 826384)**

| National Cancer Institute Developmental Therapeutics Program<br>In-Vitro Testing Results |           |                     |                                       |       |       |       |       |                |                |      |               |     |         |           |           |
|------------------------------------------------------------------------------------------|-----------|---------------------|---------------------------------------|-------|-------|-------|-------|----------------|----------------|------|---------------|-----|---------|-----------|-----------|
| NSC : D - 826384 / 1                                                                     |           |                     | Experiment ID : 2101NS68              |       |       |       |       | Test Type : 08 |                |      | Units : Molar |     |         |           |           |
| Report Date : March 07, 2021                                                             |           |                     | Test Date : January 04, 2021          |       |       |       |       | QNS :          |                |      | MC :          |     |         |           |           |
| COMI : VCG-12Q                                                                           |           |                     | Stain Reagent : SRB Dual-Pass Related |       |       |       |       | SSPL : 0ZHC    |                |      |               |     |         |           |           |
| Panel/Cell Line                                                                          | Time Zero | Log10 Concentration |                                       |       |       |       |       |                |                |      |               |     |         |           |           |
|                                                                                          |           | Ctrl                | Mean Optical Densities                |       |       |       |       |                | Percent Growth |      |               |     |         |           | GI50      |
|                                                                                          |           | -8.0                | -7.0                                  | -6.0  | -5.0  | -4.0  | -8.0  | -7.0           | -6.0           | -5.0 | -4.0          |     |         |           |           |
| <b>Leukemia</b>                                                                          |           |                     |                                       |       |       |       |       |                |                |      |               |     |         |           |           |
| CCRF-CEM                                                                                 | 0.488     | 1.741               | 1.723                                 | 1.838 | 1.136 | 0.331 | 0.355 | 99             | 108            | 52   | -32           | -27 | 1.05E-6 | 4.14E-6   | > 1.00E-4 |
| HL-60(TB)                                                                                | 0.693     | 2.530               | 2.549                                 | 2.610 | 2.435 | 0.276 | 0.301 | 101            | 104            | 95   | -60           | -57 | 1.95E-6 | 4.09E-6   | 8.60E-6   |
| K-562                                                                                    | 0.282     | 2.429               | 2.461                                 | 2.550 | 2.189 | 0.159 | 0.190 | 101            | 106            | 89   | -44           | -33 | 1.96E-6 | 4.69E-6   | > 1.00E-4 |
| MOLT-4                                                                                   | 0.721     | 2.642               | 2.652                                 | 2.679 | 2.171 | 0.526 | 0.493 | 101            | 102            | 76   | -27           | -32 | 1.77E-6 | 5.45E-6   | > 1.00E-4 |
| RPMI-8226                                                                                | 1.118     | 2.319               | 2.354                                 | 2.437 | 2.091 | 0.622 | 0.686 | 103            | 110            | 81   | -44           | -39 | 1.77E-6 | 4.42E-6   | > 1.00E-4 |
| SR                                                                                       | 0.683     | 2.768               | 2.589                                 | 2.683 | 2.508 | 0.403 | 0.480 | 91             | 96             | 88   | -41           | -30 | 1.96E-6 | 4.80E-6   | > 1.00E-4 |
| <b>Non-Small Cell Lung Cancer</b>                                                        |           |                     |                                       |       |       |       |       |                |                |      |               |     |         |           |           |
| A549/ATCC                                                                                | 0.420     | 2.214               | 2.152                                 | 2.202 | 2.117 | 0.373 | 0.254 | 97             | 99             | 95   | -11           | -40 | 2.64E-6 | 7.82E-6   | > 1.00E-4 |
| EKVX                                                                                     | 0.568     | 1.603               | 1.488                                 | 1.478 | 1.301 | 0.301 | 0.333 | 89             | 88             | 71   | -47           | -41 | 1.50E-6 | 3.99E-6   | > 1.00E-4 |
| HOP-62                                                                                   | 0.895     | 2.576               | 2.375                                 | 2.414 | 2.287 | 0.329 | 0.507 | 88             | 90             | 83   | -63           | -43 | 1.68E-6 | 3.69E-6   | .         |
| HOP-92                                                                                   | 1.491     | 2.135               | 2.000                                 | 2.064 | 1.958 | 0.677 | 0.776 | 79             | 89             | 73   | -55           | -48 | 1.50E-6 | 3.72E-6   | .         |
| NCI-H226                                                                                 | 1.047     | 2.215               | 2.112                                 | 2.182 | 2.093 | 1.184 | 0.617 | 91             | 97             | 90   | 12            | -41 | 3.22E-6 | 1.66E-5   | > 1.00E-4 |
| NCI-H23                                                                                  | 0.661     | 1.894               | 1.850                                 | 1.851 | 1.776 | 0.373 | 0.399 | 96             | 97             | 90   | -44           | -40 | 2.00E-6 | 4.73E-6   | > 1.00E-4 |
| NCI-H322M                                                                                | 0.767     | 2.030               | 2.002                                 | 2.032 | 1.902 | 0.532 | 0.258 | 98             | 100            | 90   | -31           | -66 | 2.14E-6 | 5.57E-6   | 3.48E-5   |
| NCI-H460                                                                                 | 0.296     | 2.746               | 2.836                                 | 2.739 | 2.663 | 0.091 | 0.106 | 104            | 100            | 97   | -69           | -64 | 1.91E-6 | 3.82E-6   | 7.64E-6   |
| <b>Colon Cancer</b>                                                                      |           |                     |                                       |       |       |       |       |                |                |      |               |     |         |           |           |
| COLO 205                                                                                 | 0.637     | 2.645               | 2.577                                 | 2.644 | 2.484 | 0.148 | 0.199 | 97             | 100            | 92   | -77           | -69 | 1.77E-6 | 3.51E-6   | 6.94E-6   |
| HCC-2998                                                                                 | 0.633     | 2.084               | 2.108                                 | 2.000 | 2.155 | 0.072 | 0.054 | 102            | 94             | 105  | -89           | -91 | 1.92E-6 | 3.48E-6   | 6.32E-6   |
| HCT-116                                                                                  | 0.335     | 2.626               | 2.652                                 | 2.547 | 2.496 | 0.048 | 0.082 | 101            | 97             | 94   | -86           | -76 | 1.76E-6 | 3.34E-6   | 6.33E-6   |
| HCT-15                                                                                   | 0.296     | 1.995               | 1.890                                 | 1.980 | 1.885 | 0.134 | 0.093 | 94             | 99             | 94   | -55           | -69 | 1.96E-6 | 4.27E-6   | 9.27E-6   |
| HT29                                                                                     | 0.442     | 2.650               | 2.601                                 | 2.690 | 2.592 | 0.201 | 0.218 | 98             | 102            | 97   | -55           | -51 | 2.05E-6 | 4.38E-6   | 9.34E-6   |
| KM12                                                                                     | 0.854     | 3.316               | 3.308                                 | 3.317 | 3.270 | 0.188 | 0.215 | 100            | 100            | 98   | -78           | -75 | 1.88E-6 | 3.61E-6   | 6.94E-6   |
| SW-620                                                                                   | 0.321     | 1.983               | 1.991                                 | 1.901 | 1.804 | 0.093 | 0.111 | 100            | 95             | 89   | -71           | -65 | 1.76E-6 | 3.60E-6   | 7.39E-6   |
| <b>CNS Cancer</b>                                                                        |           |                     |                                       |       |       |       |       |                |                |      |               |     |         |           |           |
| SF-268                                                                                   | 0.964     | 2.557               | 2.395                                 | 2.431 | 2.288 | 0.350 | 0.464 | 90             | 92             | 83   | -64           | -52 | 1.68E-6 | 3.68E-6   | 8.07E-6   |
| SF-295                                                                                   | 0.980     | 3.214               | 3.106                                 | 3.165 | 3.128 | 0.191 | 0.445 | 95             | 98             | 96   | -81           | -55 | 1.82E-6 | 3.50E-6   | 6.72E-6   |
| SF-539                                                                                   | 1.014     | 2.861               | 2.762                                 | 2.856 | 2.546 | 0.054 | 0.188 | 95             | 100            | 83   | -95           | -81 | 1.53E-6 | 2.93E-6   | 5.60E-6   |
| SNB-19                                                                                   | 0.546     | 1.838               | 1.821                                 | 1.854 | 1.745 | 0.242 | 0.394 | 99             | 101            | 93   | -56           | -28 | 1.94E-6 | 4.22E-6   | .         |
| SNB-75                                                                                   | 1.164     | 2.054               | 1.731                                 | 1.818 | 1.683 | 0.080 | 0.292 | 64             | 73             | 58   | -93           | -75 | 1.13E-6 | 2.42E-6   | 5.19E-6   |
| U251                                                                                     | 0.429     | 1.863               | 1.902                                 | 1.940 | 1.899 | 0.180 | 0.227 | 103            | 105            | 103  | -58           | -47 | 2.12E-6 | 4.35E-6   | .         |
| <b>Melanoma</b>                                                                          |           |                     |                                       |       |       |       |       |                |                |      |               |     |         |           |           |
| LOX IMVI                                                                                 | 0.305     | 1.939               | 1.929                                 | 2.008 | 1.818 | 0.070 | 0.108 | 99             | 104            | 93   | -77           | -65 | 1.78E-6 | 3.51E-6   | 6.93E-6   |
| MALME-3M                                                                                 | 0.832     | 2.088               | 2.096                                 | 2.187 | 2.163 | 0.181 | 0.284 | 101            | 108            | 106  | -78           | -66 | 2.01E-6 | 3.76E-6   | 7.03E-6   |
| M14                                                                                      | 0.545     | 1.964               | 1.911                                 | 1.873 | 1.899 | 0.151 | 0.179 | 96             | 94             | 95   | -72           | -67 | 1.86E-6 | 3.70E-6   | 7.36E-6   |
| MDA-MB-435                                                                               | 0.575     | 2.652               | 2.603                                 | 2.558 | 2.444 | 0.043 | 0.125 | 98             | 95             | 90   | -93           | -78 | 1.66E-6 | 3.11E-6   | 5.84E-6   |
| SK-MEL-2                                                                                 | 1.298     | 2.444               | 2.355                                 | 2.478 | 2.231 | 0.486 | 0.811 | 92             | 103            | 81   | -63           | -38 | 1.65E-6 | 3.68E-6   | .         |
| SK-MEL-28                                                                                | 0.553     | 1.653               | 1.661                                 | 1.669 | 1.527 | 0.028 | 0.085 | 101            | 101            | 89   | -85           | -85 | 1.62E-6 | 3.04E-6   | 5.69E-6   |
| SK-MEL-5                                                                                 | 1.089     | 3.212               | 3.187                                 | 3.183 | 3.035 | 0.006 | 0.111 | 99             | 99             | 92   | -99           | -90 | 1.65E-6 | 3.02E-6   | 5.51E-6   |
| UACC-257                                                                                 | 1.013     | 2.311               | 2.237                                 | 2.308 | 2.284 | 0.340 | 0.478 | 94             | 100            | 98   | -66           | -53 | 1.96E-6 | 3.94E-6   | 7.94E-6   |
| UACC-62                                                                                  | 0.918     | 2.602               | 2.469                                 | 2.545 | 2.513 | 0.115 | 0.281 | 92             | 97             | 95   | -87           | -69 | 1.76E-6 | 3.31E-6   | 6.23E-6   |
| <b>Ovarian Cancer</b>                                                                    |           |                     |                                       |       |       |       |       |                |                |      |               |     |         |           |           |
| IGROV1                                                                                   | 0.342     | 1.708               | 1.625                                 | 1.689 | 1.489 | 0.165 | 0.178 | 94             | 99             | 84   | -52           | -48 | 1.78E-6 | 4.16E-6   | .         |
| OVCAR-3                                                                                  | 0.626     | 1.920               | 1.949                                 | 2.010 | 1.887 | 0.127 | 0.139 | 102            | 107            | 97   | -80           | -78 | 1.85E-6 | 3.55E-6   | 6.79E-6   |
| OVCAR-4                                                                                  | 0.761     | 1.968               | 1.908                                 | 1.974 | 1.766 | 0.197 | 0.115 | 95             | 100            | 83   | -74           | -85 | 1.63E-6 | 3.38E-6   | 7.03E-6   |
| OVCAR-5                                                                                  | 0.491     | 1.327               | 1.282                                 | 1.278 | 1.263 | 0.120 | 0.120 | 95             | 94             | 92   | -76           | -76 | 1.79E-6 | 3.55E-6   | 7.04E-6   |
| OVCAR-8                                                                                  | 0.738     | 2.697               | 2.637                                 | 2.653 | 2.570 | 0.539 | 0.781 | 97             | 98             | 93   | -27           | 2   | 2.30E-6 | .         | > 1.00E-4 |
| NCI/ADR-RES                                                                              | 0.514     | 1.776               | 1.811                                 | 1.824 | 1.752 | 0.977 | 0.951 | 103            | 104            | 98   | 37            | 35  | 6.07E-6 | > 1.00E-4 | > 1.00E-4 |
| SK-OV-3                                                                                  | 1.344     | 2.448               | 2.506                                 | 2.527 | 2.504 | 2.520 | 0.923 | 105            | 107            | 105  | 106           | -31 | 2.57E-5 | 5.92E-5   | > 1.00E-4 |
| <b>Renal Cancer</b>                                                                      |           |                     |                                       |       |       |       |       |                |                |      |               |     |         |           |           |
| 786-0                                                                                    | 0.678     | 2.525               | 2.416                                 | 2.533 | 2.238 | 0.046 | 0.322 | 94             | 100            | 84   | -93           | -53 | 1.56E-6 | 2.99E-6   | 5.71E-6   |
| A498                                                                                     | 1.770     | 2.477               | 2.239                                 | 2.138 | 2.129 | 0.376 | 0.492 | 66             | 52             | 61   | -79           | -72 | 1.01E-6 | 2.47E-6   | 6.00E-6   |
| ACHN                                                                                     | 0.474     | 1.955               | 1.964                                 | 1.994 | 1.882 | 0.039 | 0.101 | 101            | 103            | 95   | -92           | -79 | 1.74E-6 | 3.22E-6   | 5.97E-6   |
| CAKI-1                                                                                   | 0.918     | 2.896               | 2.632                                 | 2.686 | 2.575 | 0.193 | 0.318 | 87             | 89             | 84   | -79           | -65 | 1.61E-6 | 3.27E-6   | 6.64E-6   |
| RXF 393                                                                                  | 1.070     | 1.526               | 1.403                                 | 1.481 | 1.398 | 0.150 | 0.601 | 73             | 90             | 72   | -86           | -44 | 1.38E-6 | 2.85E-6   | .         |
| SN12C                                                                                    | 1.323     | 3.254               | 3.128                                 | 3.116 | 3.028 | 0.334 | 0.410 | 93             | 93             | 88   | -75           | -69 | 1.72E-6 | 3.48E-6   | 7.05E-6   |
| TK-10                                                                                    | 1.107     | 1.938               | 1.789                                 | 1.916 | 1.929 | 0.335 | 0.197 | 82             | 97             | 99   | -70           | -82 | 1.95E-6 | 3.86E-6   | 7.63E-6   |
| UO-31                                                                                    | 0.716     | 2.186               | 1.899                                 | 1.939 | 1.841 | 0.265 | 0.347 | 80             | 83             | 77   | -63           | -52 | 1.55E-6 | 3.54E-6   | 8.07E-6   |
| <b>Prostate Cancer</b>                                                                   |           |                     |                                       |       |       |       |       |                |                |      |               |     |         |           |           |
| PC-3                                                                                     | 0.835     | 2.451               | 2.363                                 | 2.398 | 2.200 | 0.685 | 0.664 | 95             | 97             | 84   | -18           | -20 | 2.17E-6 | 6.68E-6   | > 1.00E-4 |
| DU-145                                                                                   | 0.453     | 1.773               | 1.777                                 | 1.792 | 1.681 | 0.089 | 0.087 | 100            | 101            | 93   | -80           | -81 | 1.77E-6 | 3.44E-6   | 6.67E-6   |
| <b>Breast Cancer</b>                                                                     |           |                     |                                       |       |       |       |       |                |                |      |               |     |         |           |           |
| MCF7                                                                                     | 0.480     | 2.425               | 2.272                                 | 2.332 | 2.100 | 0.207 | 0.263 | 92             | 95             | 83   | -57           | -45 | 1.73E-6 | 3.92E-6   | .         |
| MDA-MB-231/ATCC                                                                          | 0.685     | 1.455               | 1.420                                 | 1.454 | 1.289 | 0.106 | 0.287 | 92             | 100            | 78   | -85           | -58 | 1.49E-6 | 3.03E-6   | 6.14E-6   |
| HS 578T                                                                                  | 0.817     | 1.779               | 1.702                                 | 1.771 | 1.696 | 0.426 | 0.628 | 92             | 99             | 91   | -48           | -23 | 1.98E-6 | 4.53E-6   | > 1.00E-4 |
| BT-549                                                                                   | 1.257     | 2.180               | 2.237                                 | 2.180 | 2.309 | 0.451 | 0.436 | 106            | 100            | 114  | -64           | -65 | 2.29E-6 | 4.36E-6   | 8.33E-6   |
| T-47D                                                                                    | 1.008     | 2.472               | 2.318                                 | 2.346 | 2.290 | 0.567 | 0.602 | 89             | 91             | 88   | -44           | -40 | 1.93E-6 | 4.64E-6   | > 1.00E-4 |
| MDA-MB-468                                                                               | 0.703     | 1.891               | 1.899                                 | 1.947 | 1.842 | 0.107 | 0.140 | 101            | 105            | 96   | -85           | -80 | 1.79E-6 | 3.39E-6   | 6.42E-6   |

# National Cancer Institute Developmental Therapeutics Program Dose Response Curves - Compound 16c (NSC: 826384)

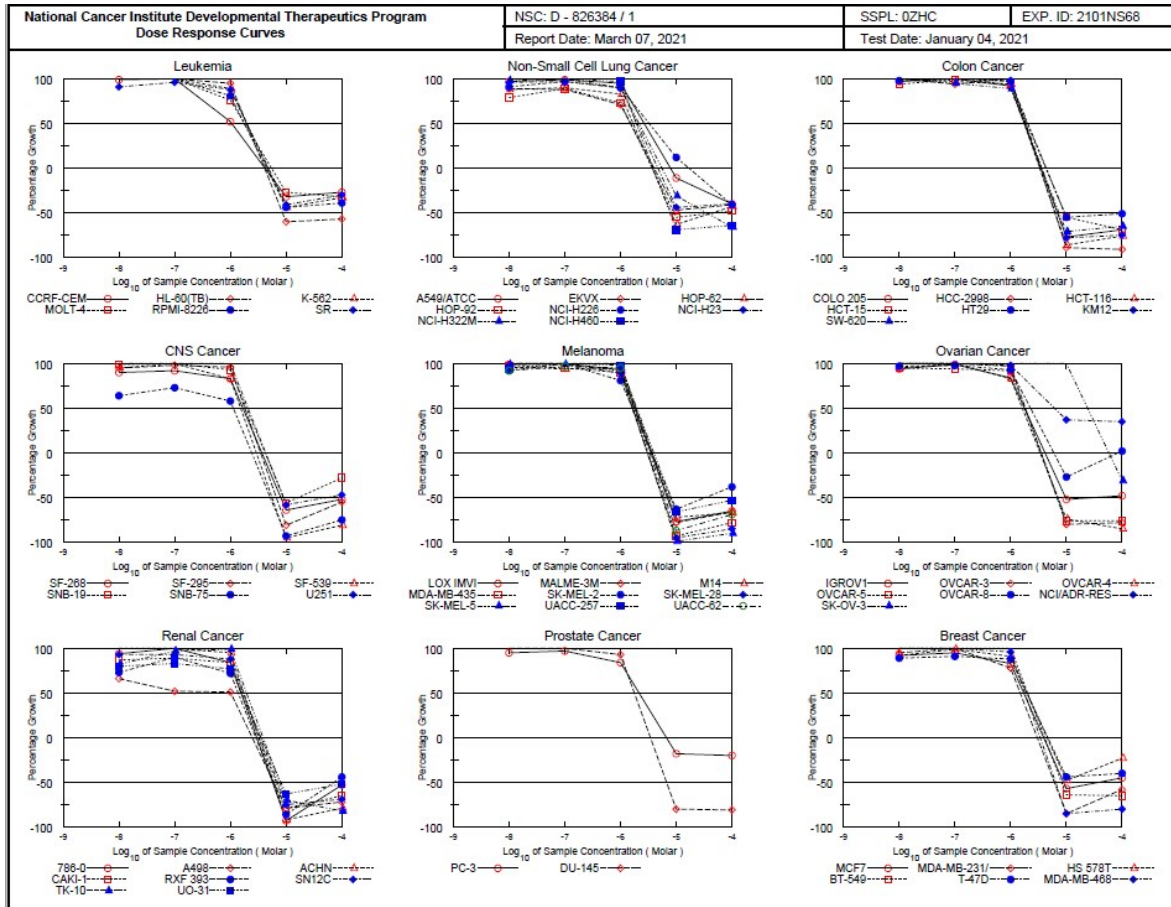

### Compound 14a

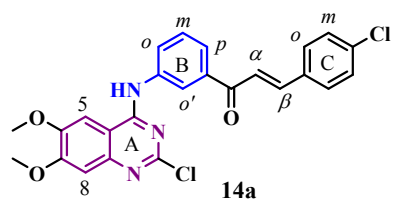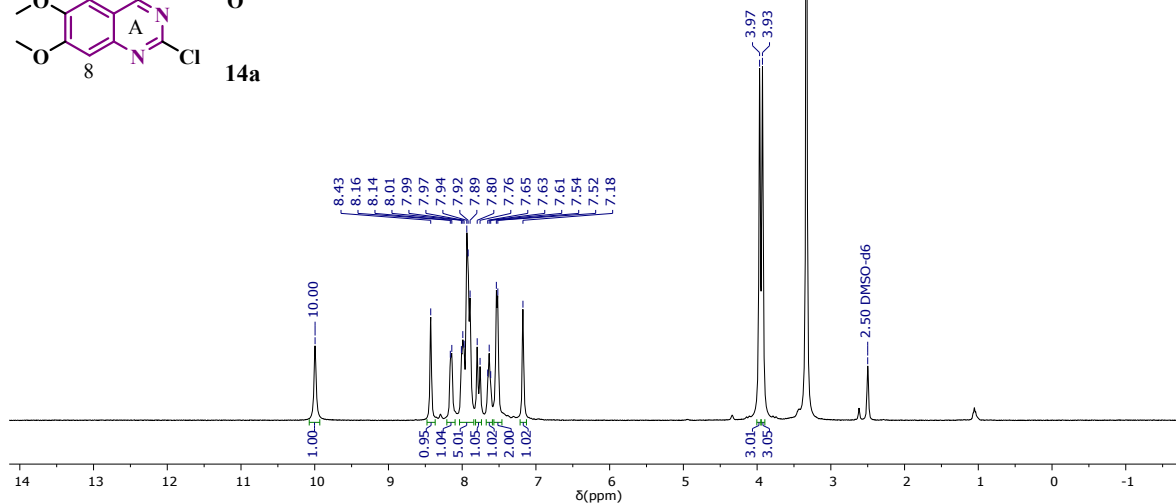

$^1\text{H}$  NMR (400 MHz,  $\text{DMSO-}d_6$ ) spectrum of 14a.

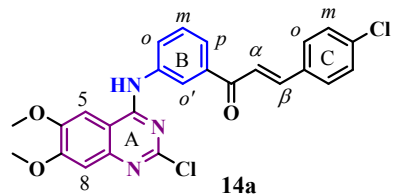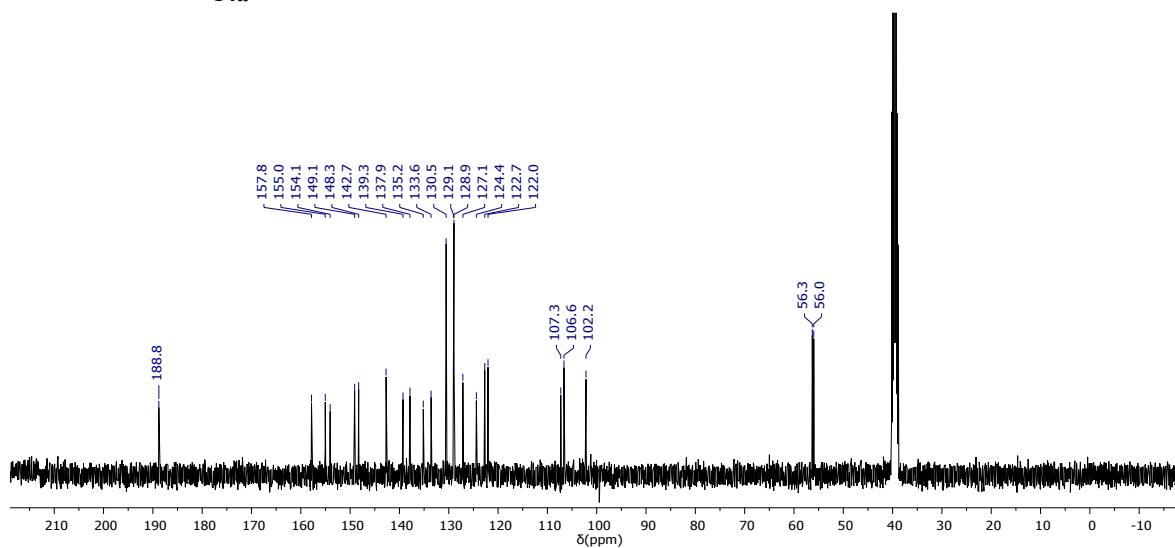

$^{13}\text{C}$  NMR (100 MHz,  $\text{DMSO-}d_6$ ) spectrum of 14a.

### Compound 14c

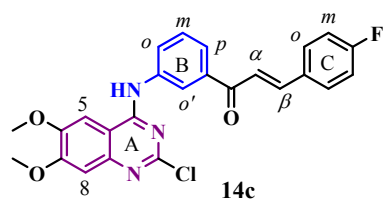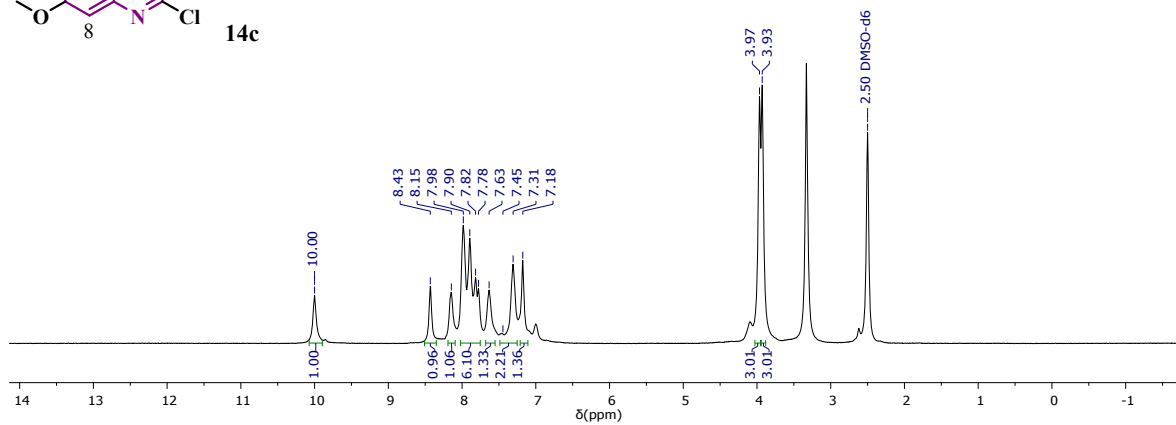

$^1\text{H}$  NMR (400 MHz,  $\text{DMSO-}d_6$ ) spectrum of 14c.

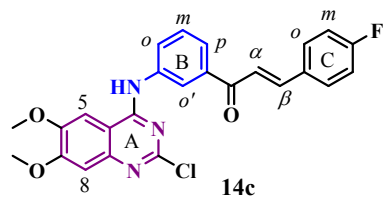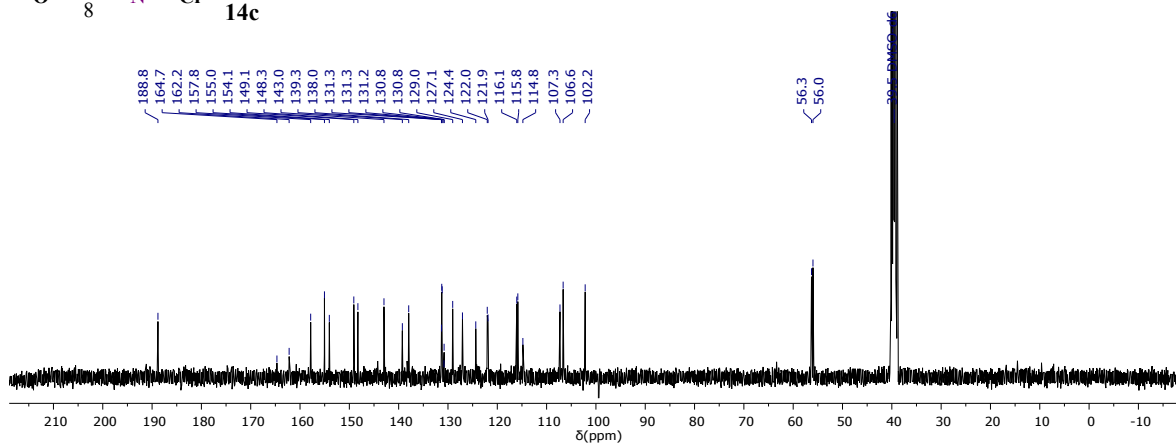

$^{13}\text{C}$  NMR (100 MHz,  $\text{DMSO-}d_6$ ) spectrum of 14c.

### Compound 14e

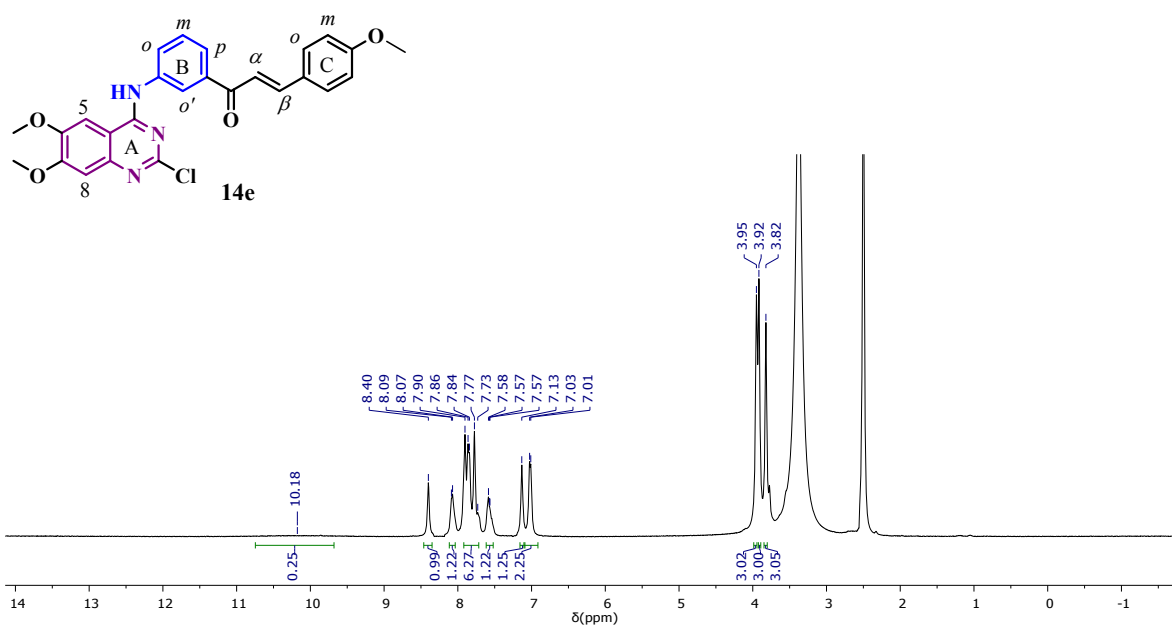

<sup>1</sup>H NMR (400 MHz, DMSO-d<sub>6</sub>) spectrum of **14e**.

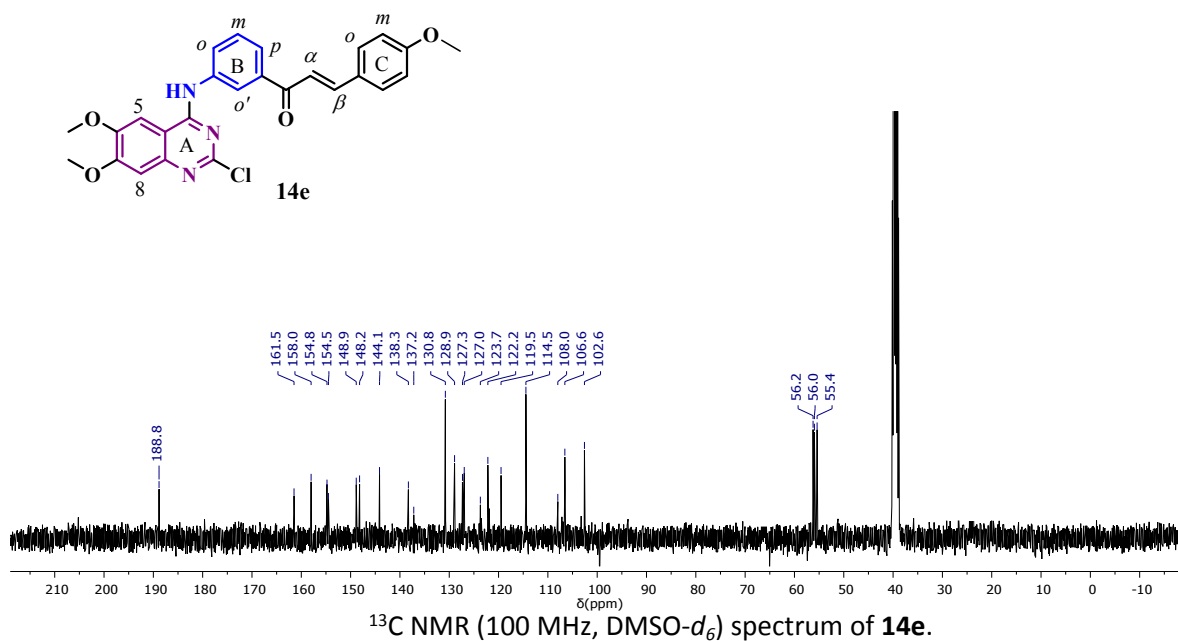

<sup>13</sup>C NMR (100 MHz, DMSO-d<sub>6</sub>) spectrum of **14e**.

### Compound 14g

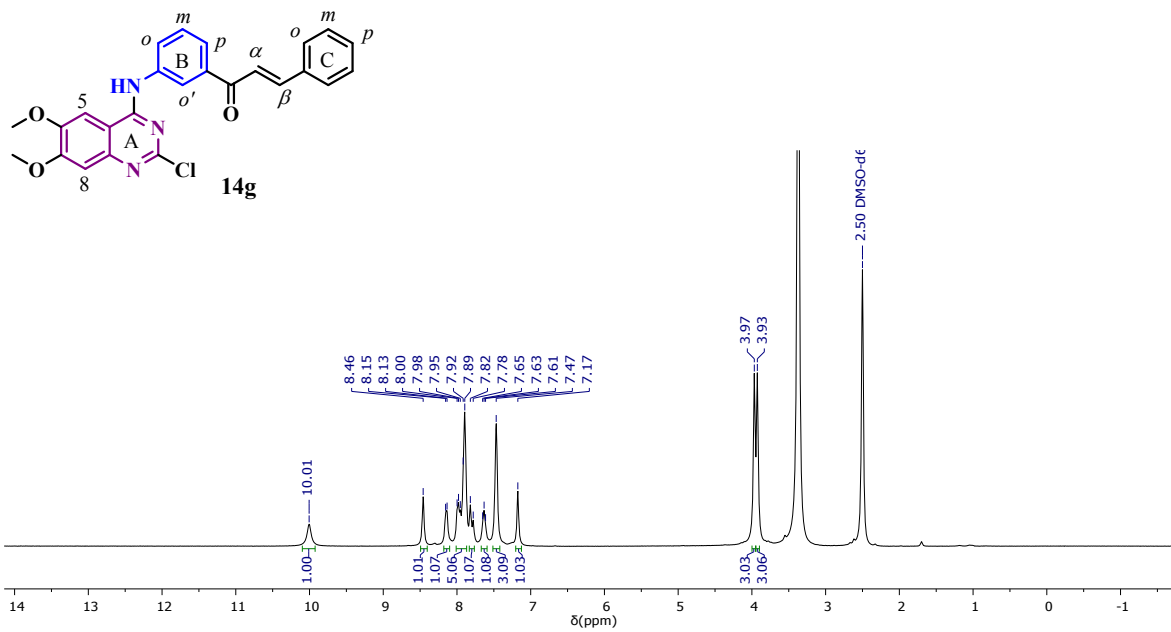

$^1\text{H}$  NMR (400 MHz,  $\text{DMSO-}d_6$ ) spectrum of **14g**.

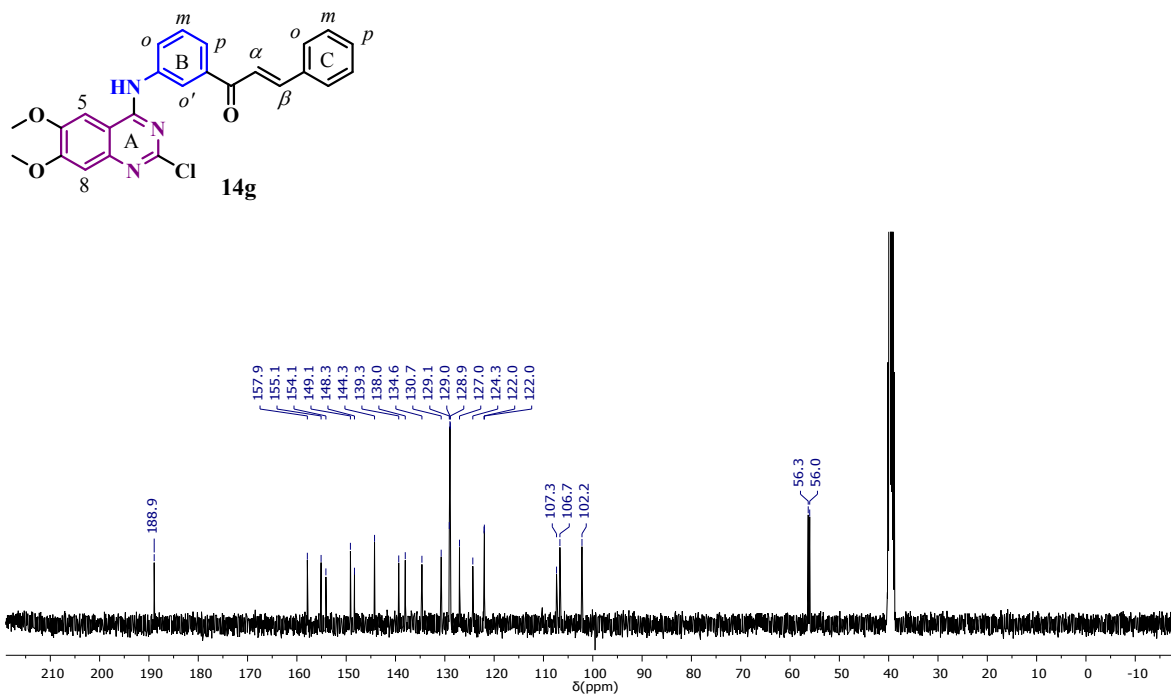

$^{13}\text{C}$  NMR (100 MHz,  $\text{DMSO-}d_6$ ) spectrum of **14g**.

### Compound 16a

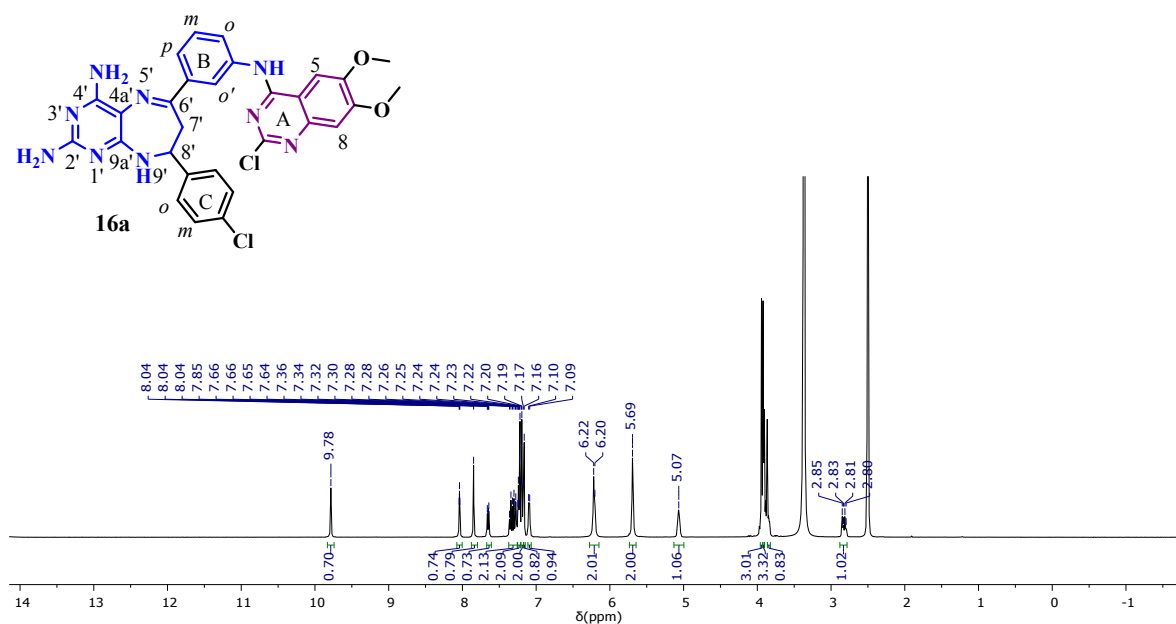

<sup>1</sup>H NMR (400 MHz, DMSO-*d*<sub>6</sub>) spectrum of 16a.

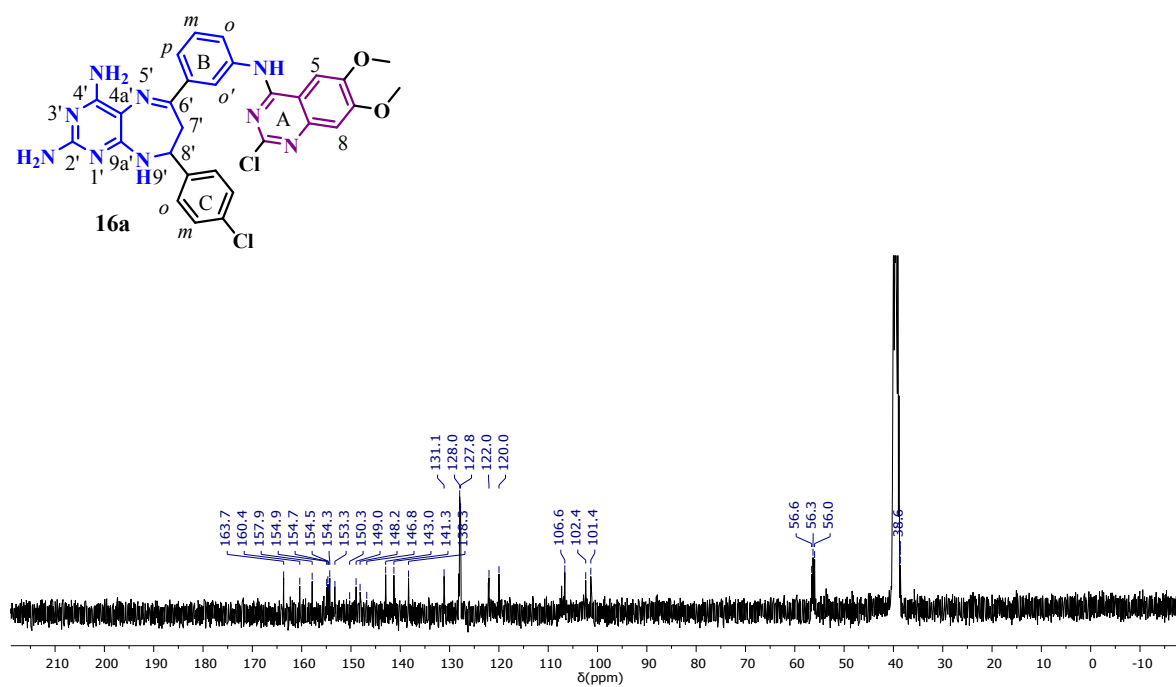

<sup>13</sup>C NMR (100 MHz, DMSO-*d*<sub>6</sub>) spectrum of 16a.

### Compound 16c

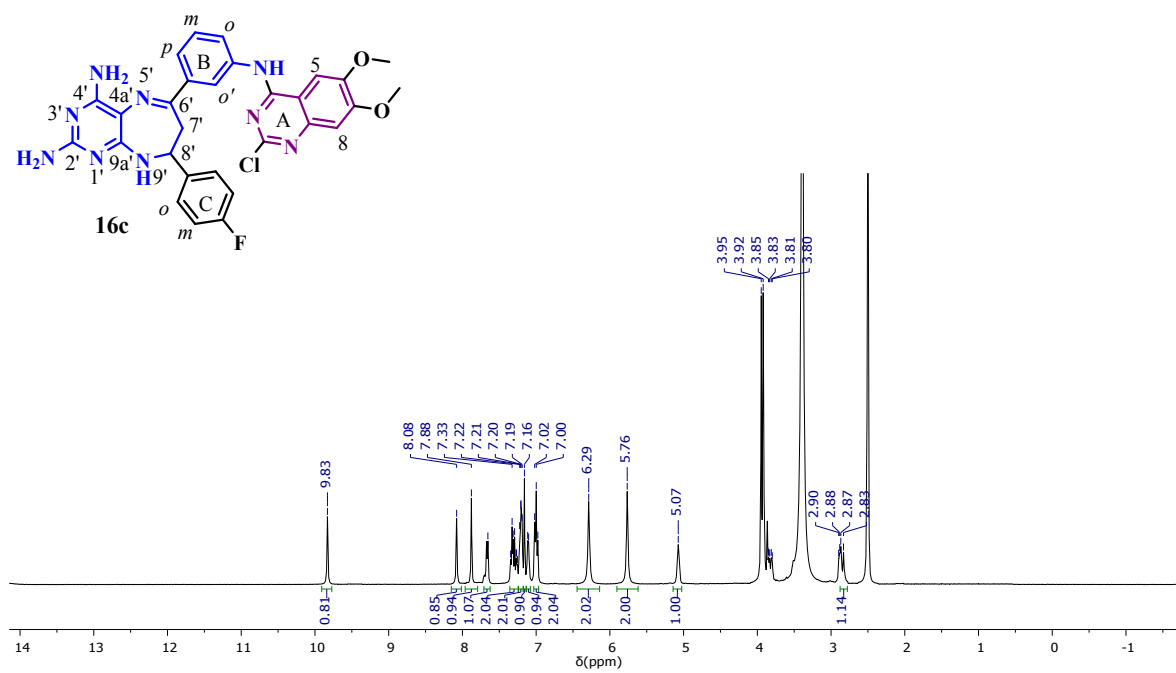

<sup>1</sup>H NMR (400 MHz, DMSO-*d*<sub>6</sub>) spectrum of **16c**.

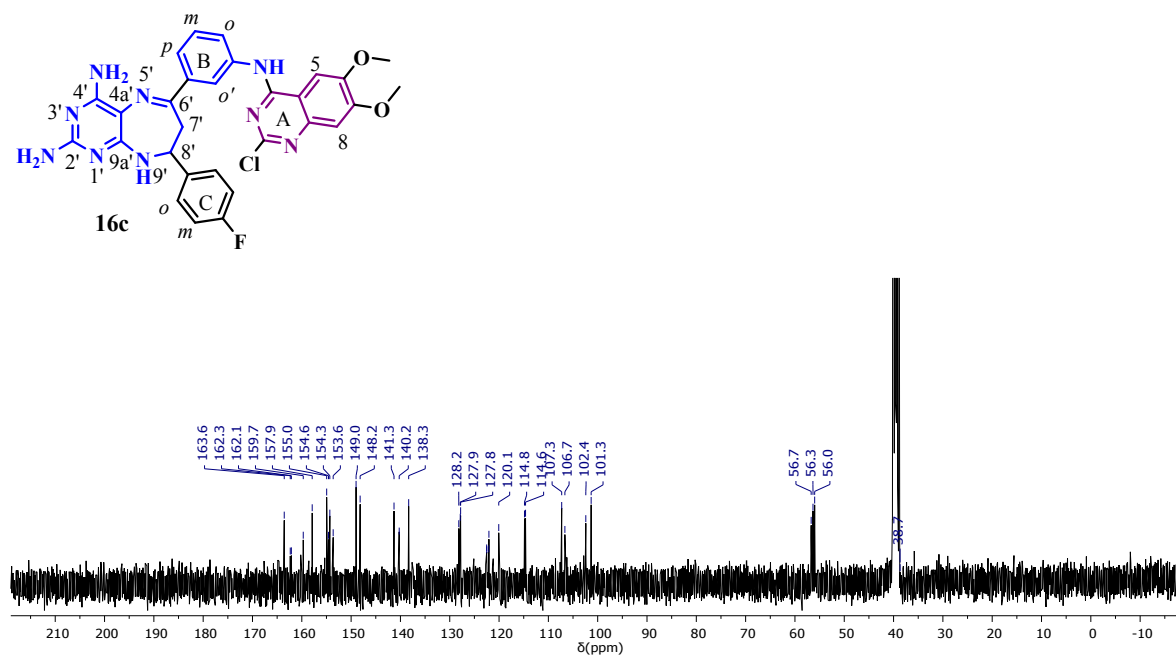

<sup>13</sup>C NMR (100 MHz, DMSO-*d*<sub>6</sub>) spectrum of **16c**.



### Compound 16e

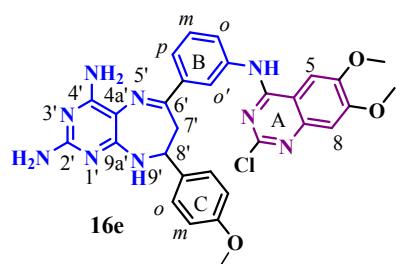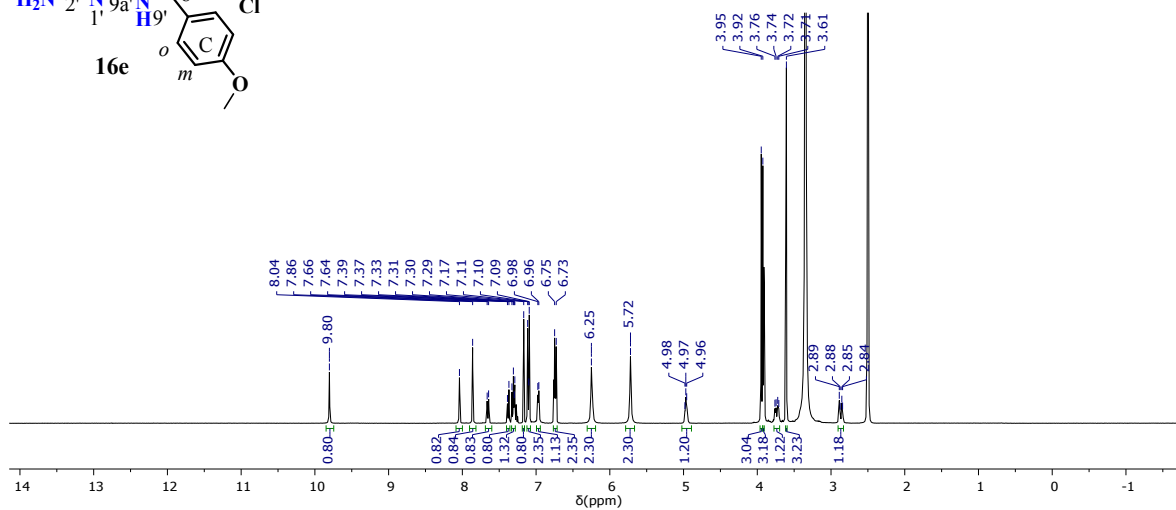

<sup>1</sup>H NMR (400 MHz, DMSO-*d*<sub>6</sub>) spectrum of **16e**.

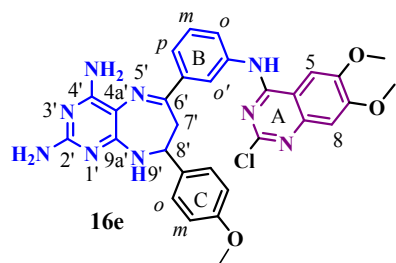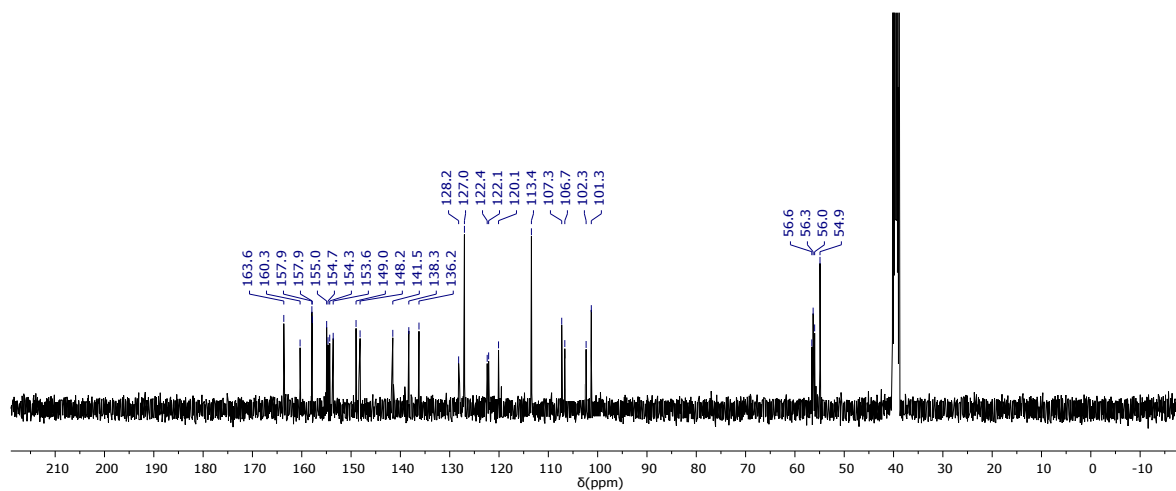

$^{13}\text{C}$  NMR (100 MHz,  $\text{DMSO-}d_6$ ) spectrum of **16e**.

Compound **16g**

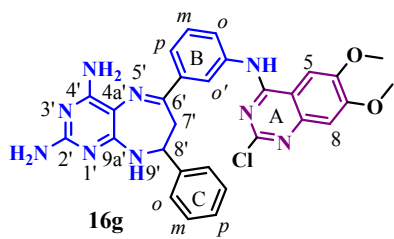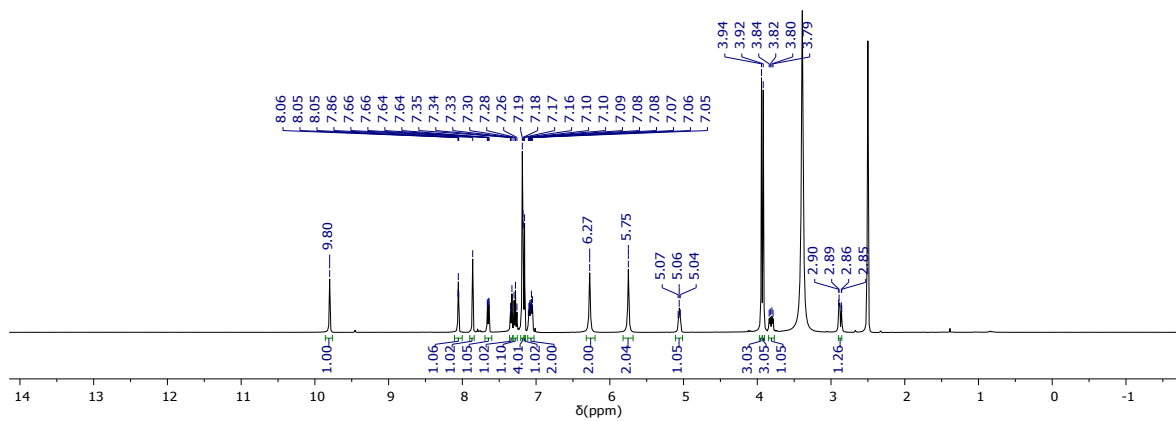

$^1\text{H}$  NMR (400 MHz,  $\text{DMSO-}d_6$ ) spectrum of **16g**.

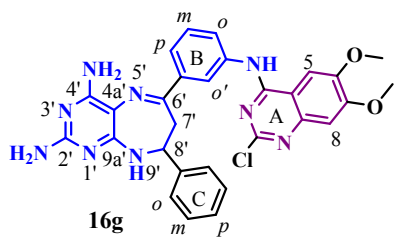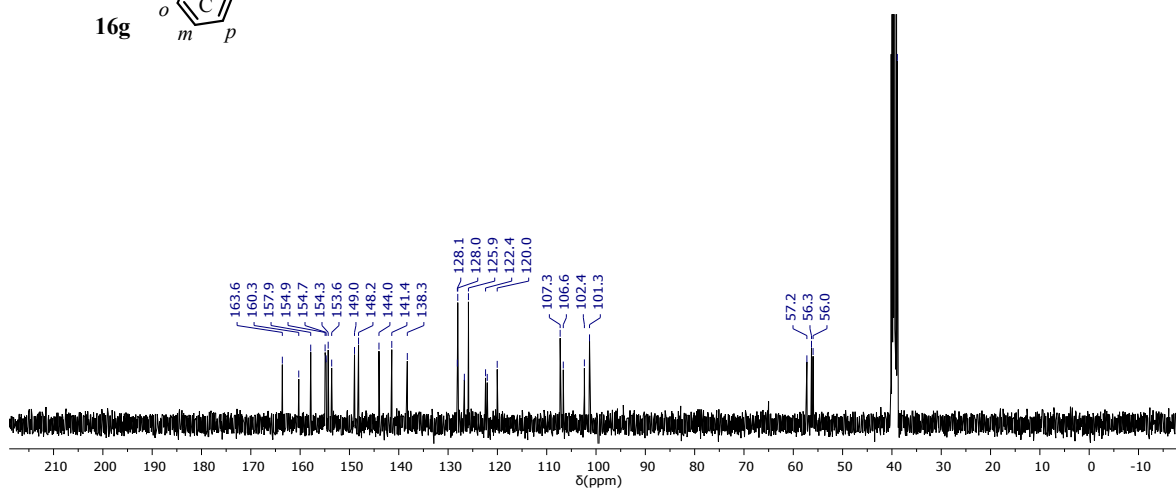

$^{13}\text{C}$  NMR (100 MHz,  $\text{DMSO-}d_6$ ) spectrum of **16g**.
